# Supplementary material
Source: Springer Nature journal article supplement (https://www.springermedizin.de/resource/supplementary/13013_2010_324_MOESM5_ESM.pdf/9631630)

# Thoracic & thoraco-lumbar curve module

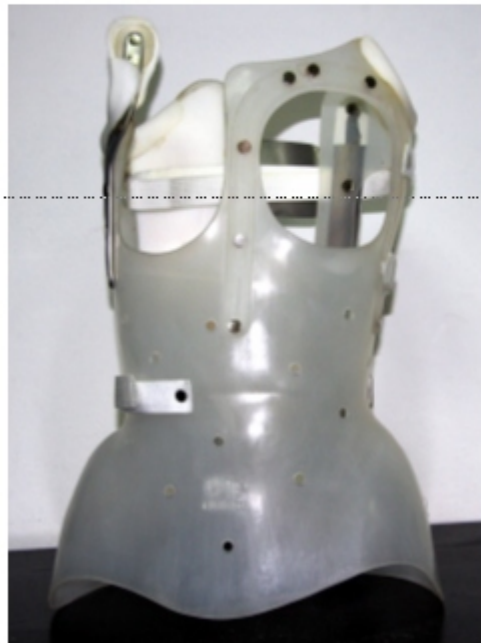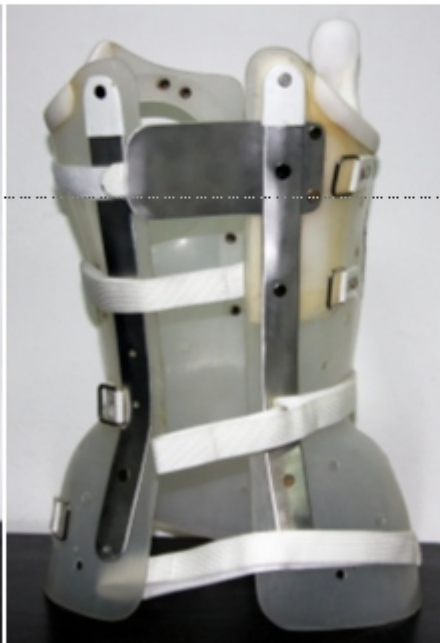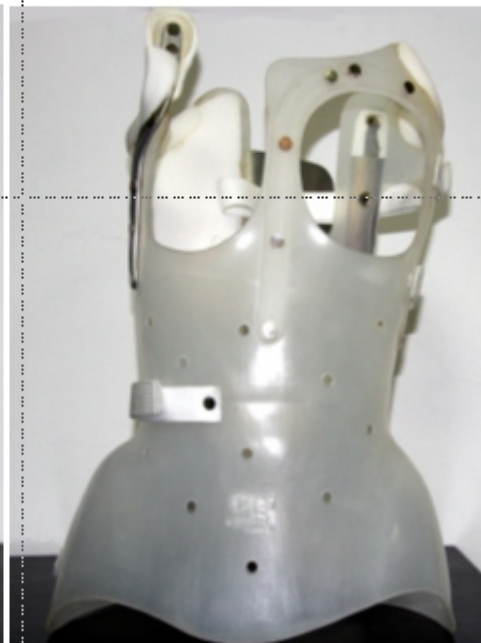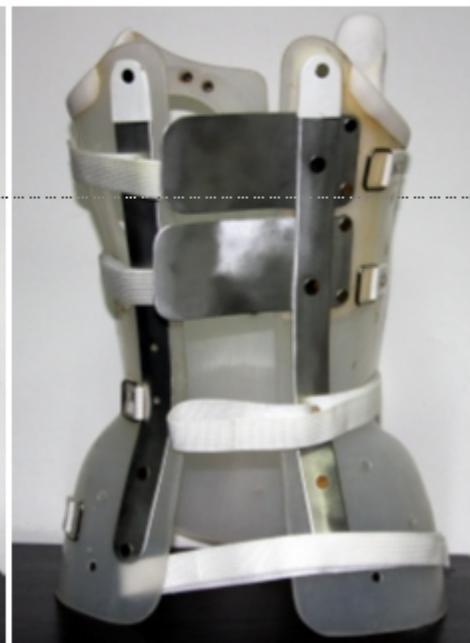

Supplement: MOESM5 [file 9631630]
